# Supplementary material for: Preharvest Sprouting in Quinoa: A New Screening Method Adapted to Panicles and GWAS Components
Source: MDPI journal article supplement (doi:10.3390/plants13101297), 2024-05-08
Supplement: s1 [file s1]

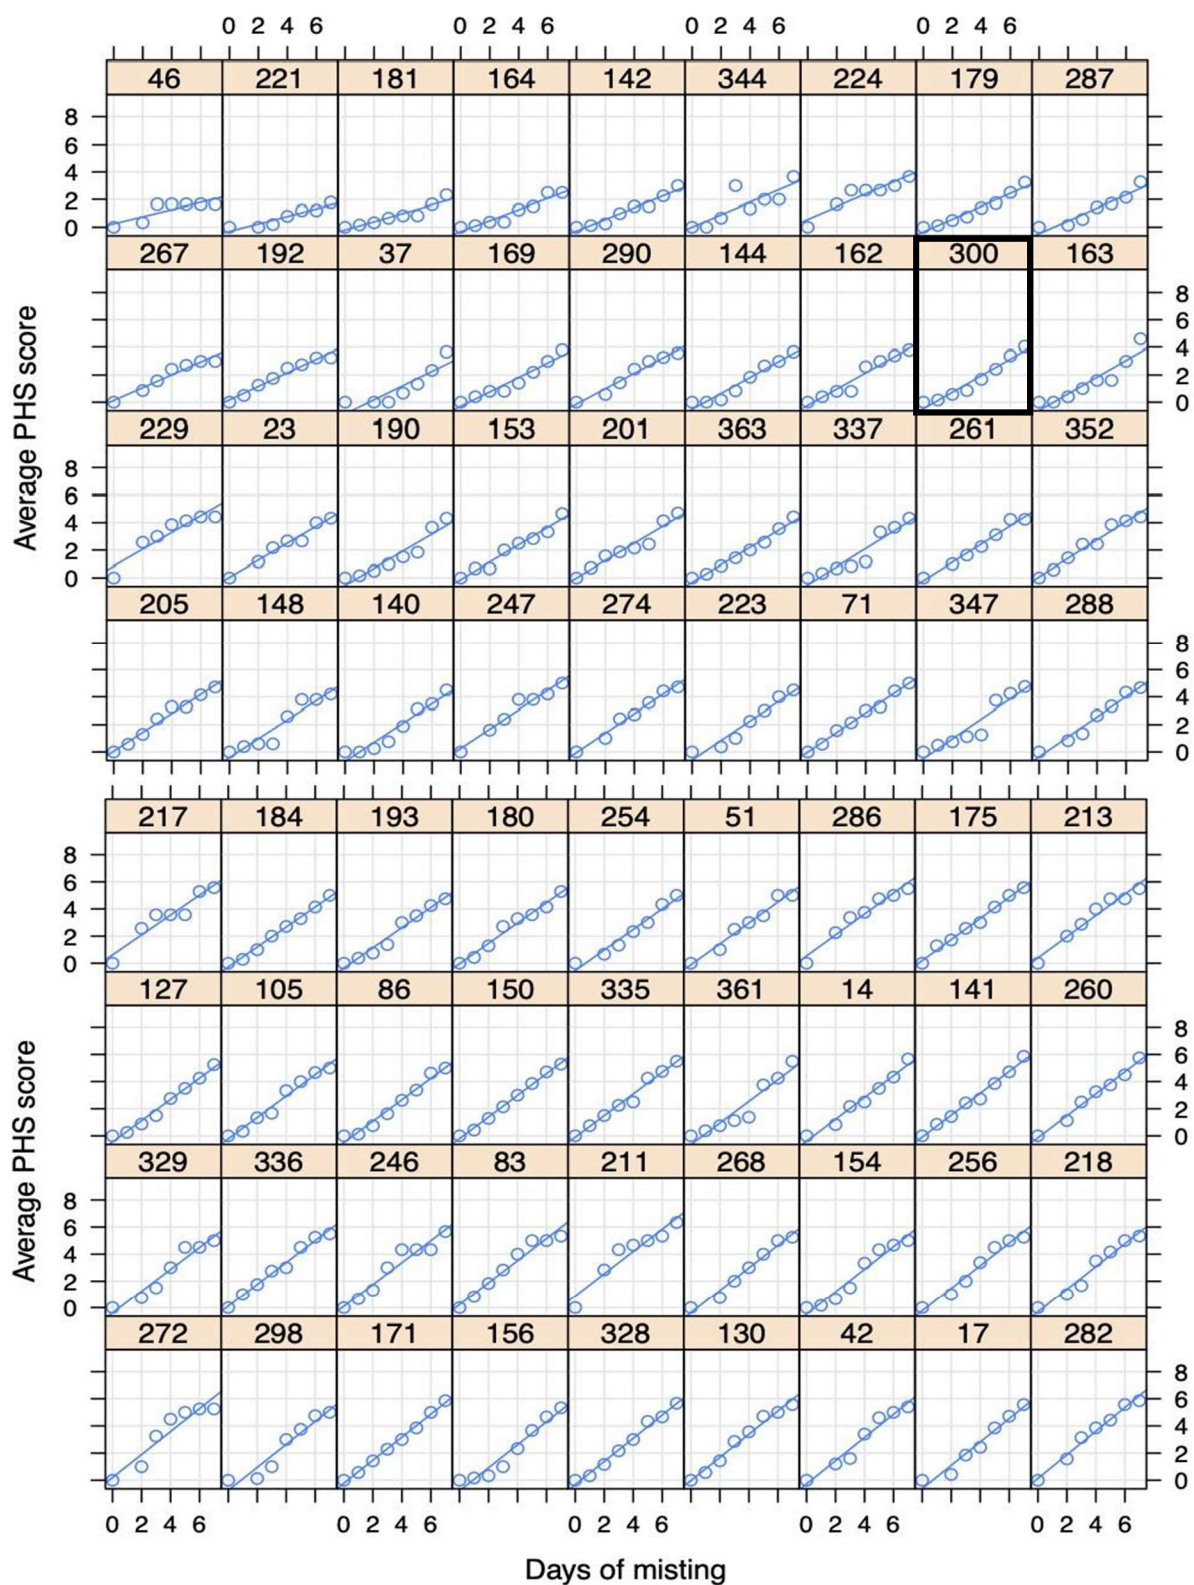

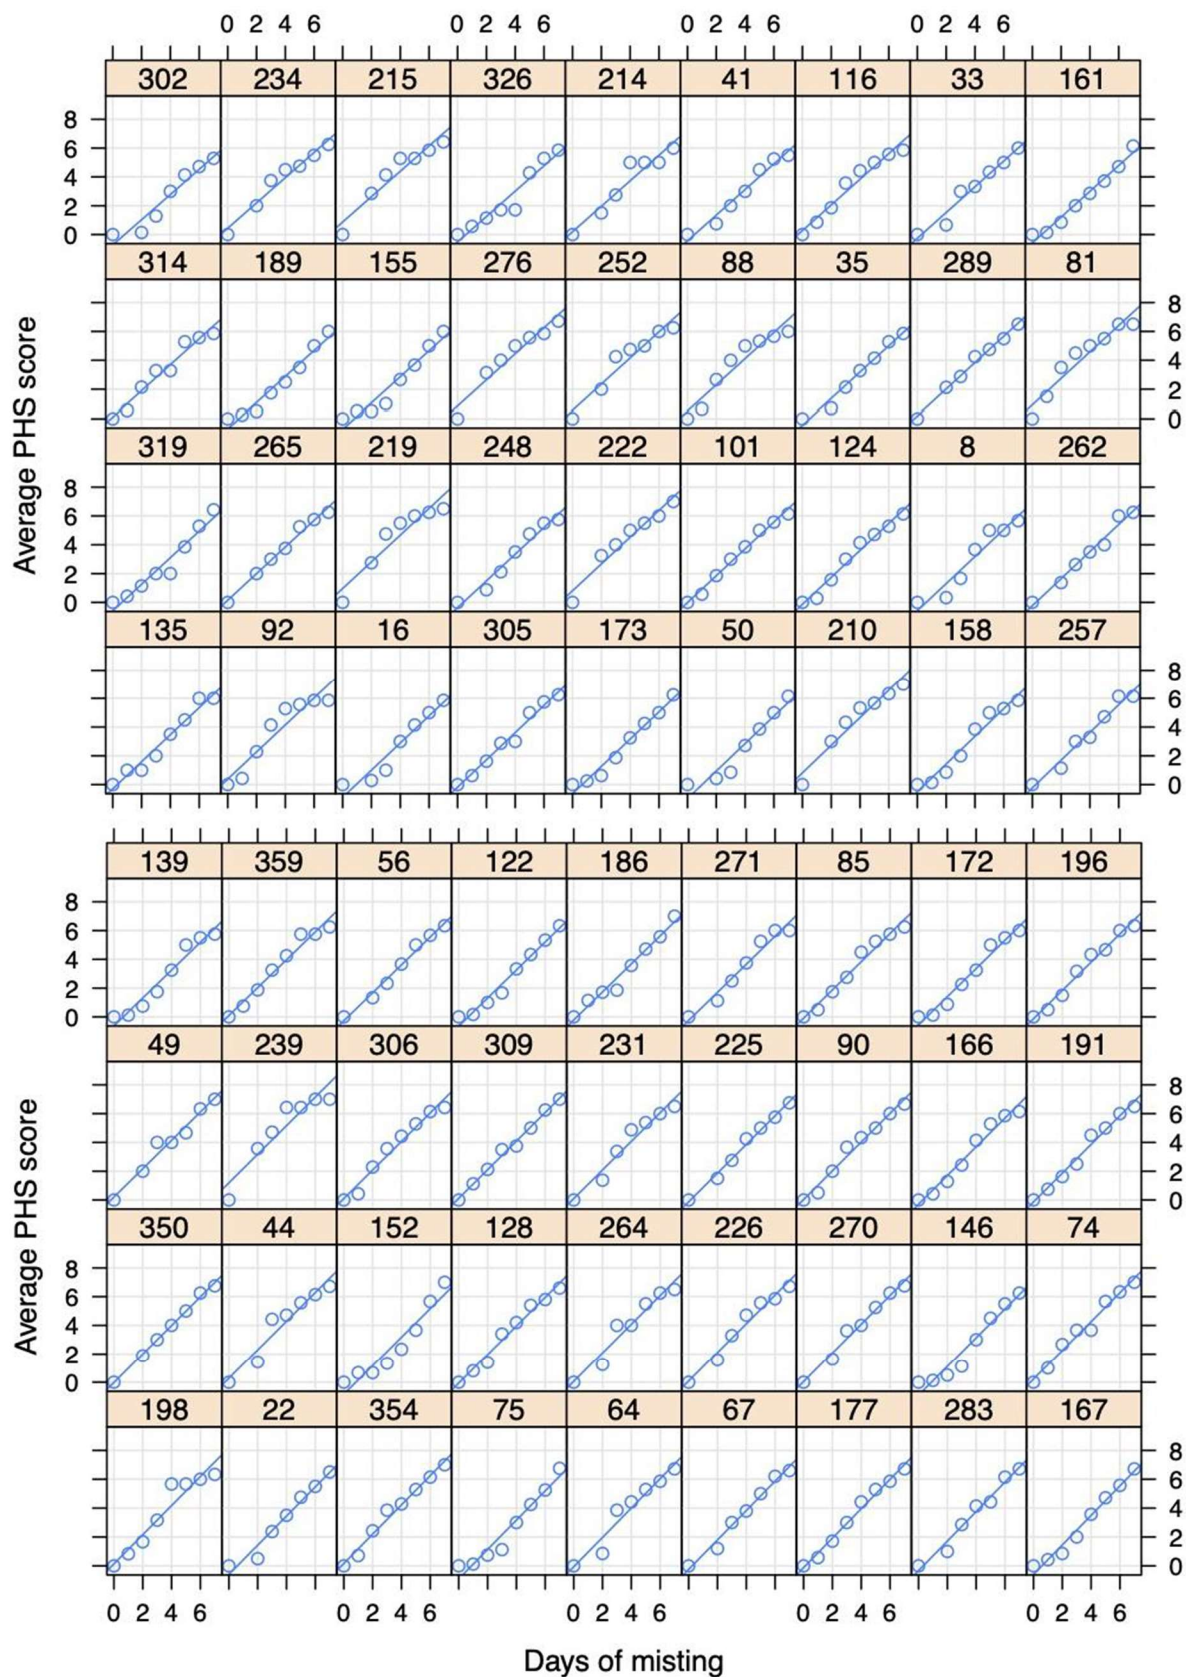



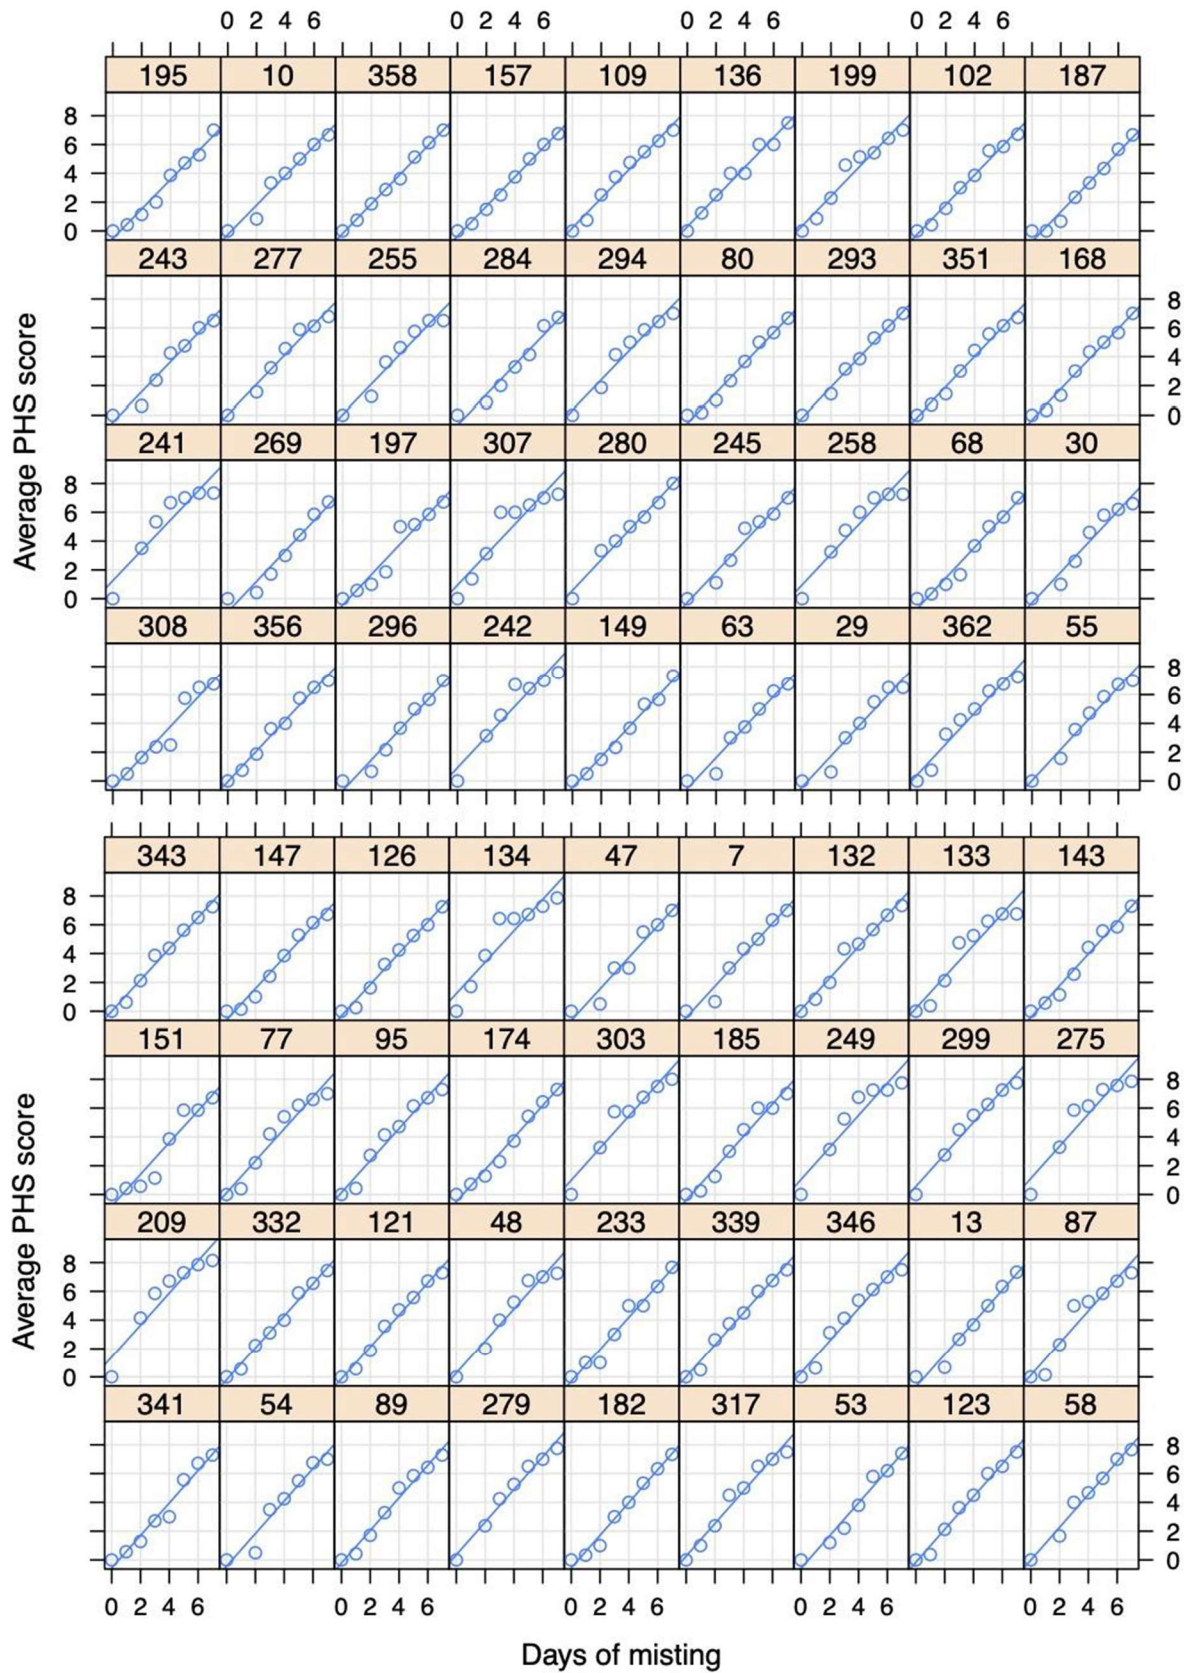

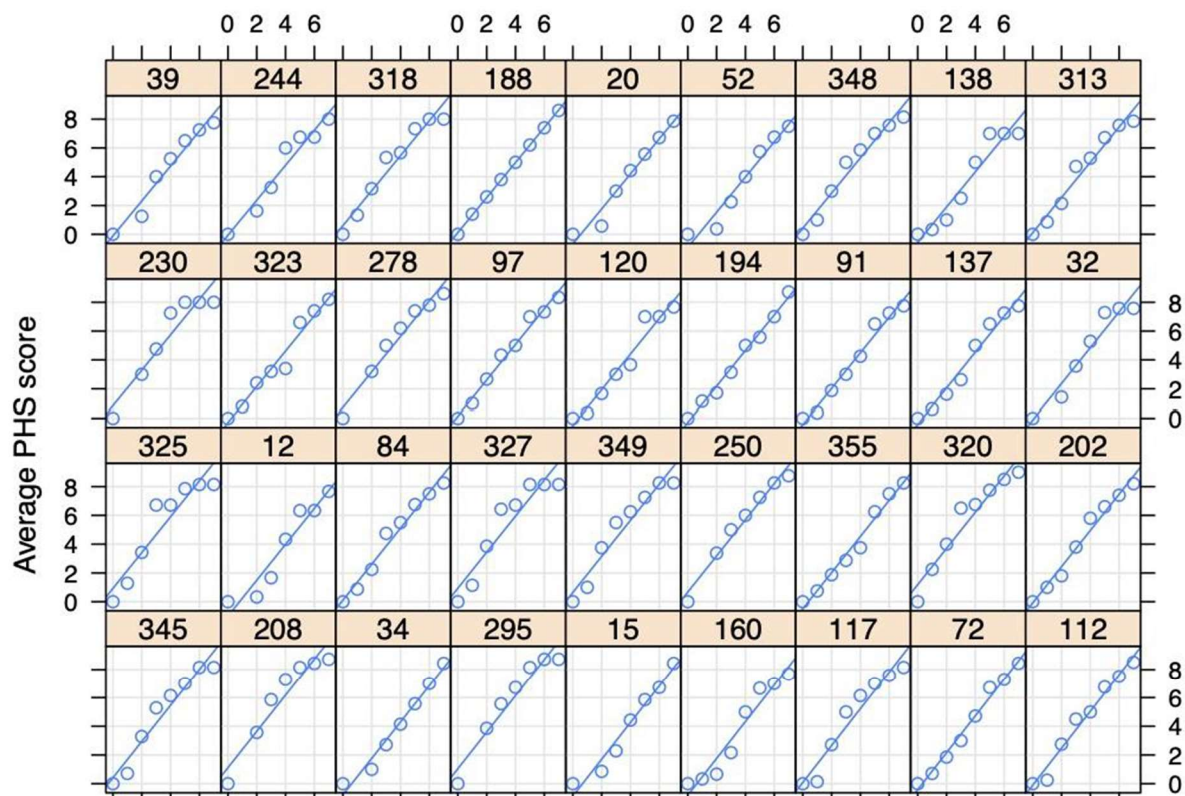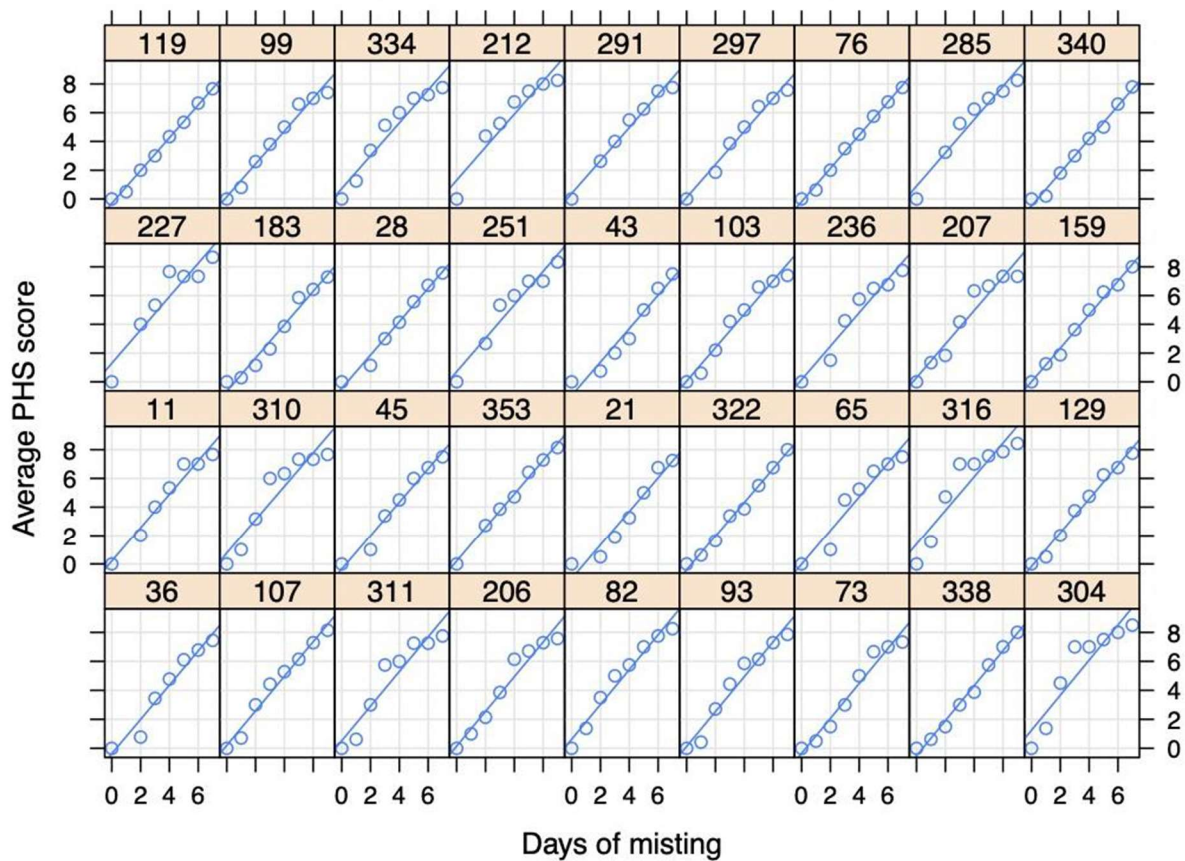



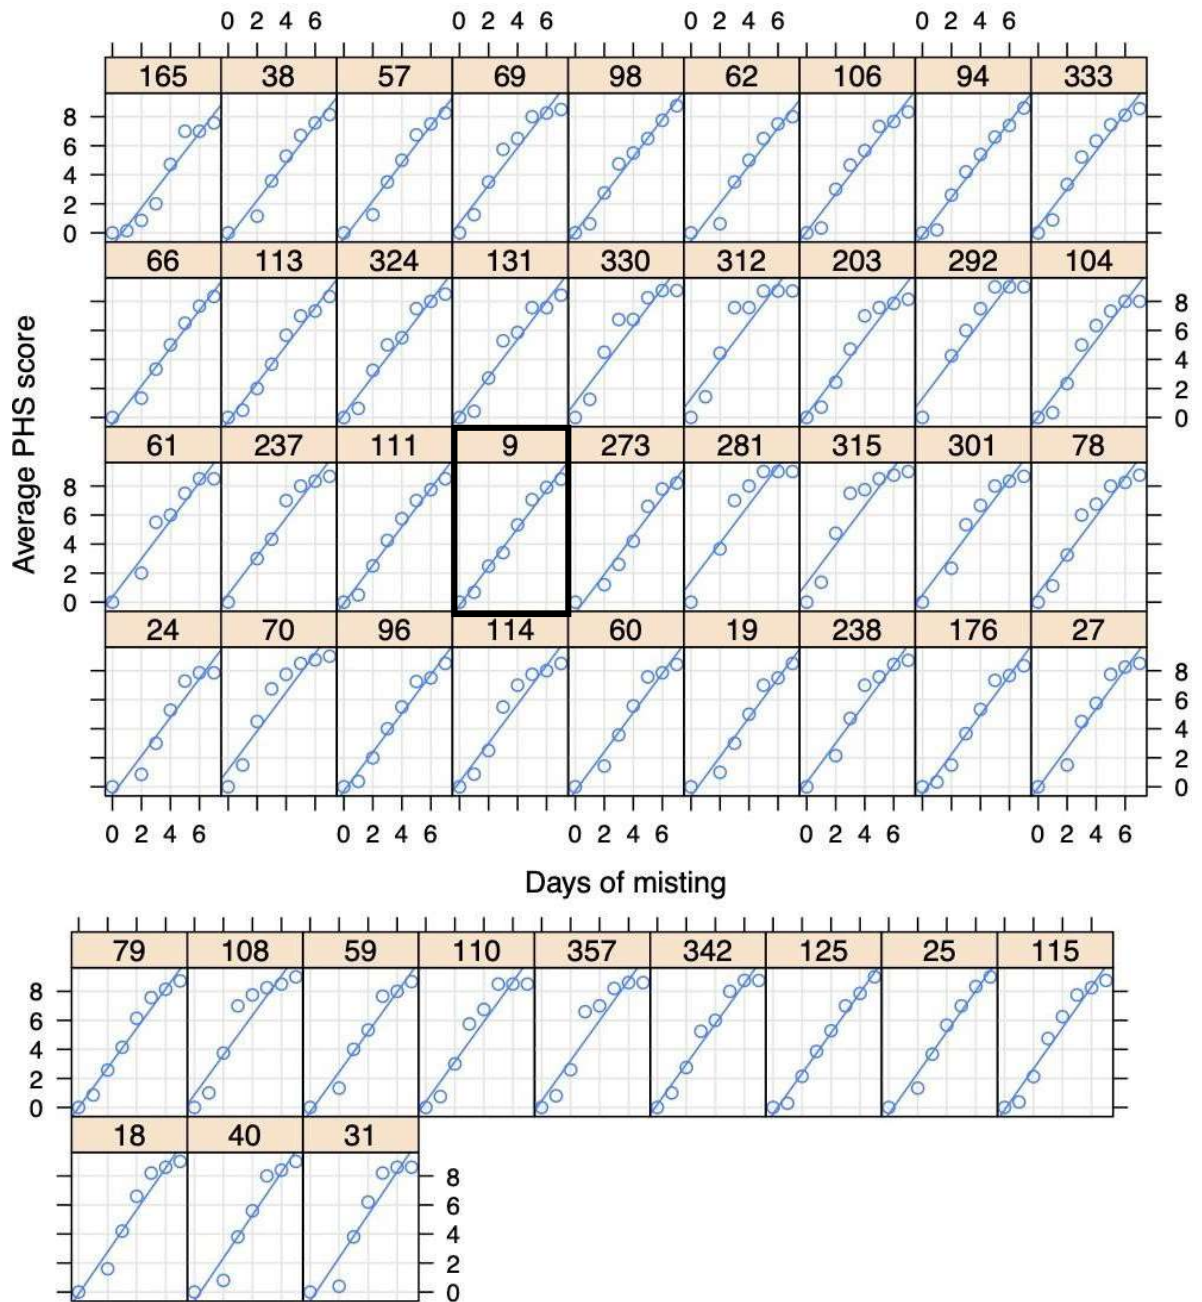

**Figure S1:** XY plots fitting a linear model for mean PHS scores (y axis) over 7 days of misting (x axis). Controls are bolded with a black line (ID 9 is PHS-susceptible, ID 300 is PHS-tolerant). Plots are shown ascendingly in respect to slope values, which reflect decreasing PHS tolerance. All genotypes include a value of 0 on day 0 to homogenize starting point for all lines.
